# Supplementary material for: POWERDRESS and Diversified Expression of the MIR172 Gene Family Bolster the Floral Stem Cell Network
Source: PubMed Central journal article supplement (PMC3547843; doi:10.1371/journal.pgen.1003218), 2013-01-17
Supplement: pgen.1003218.s003.pdf [file pgen.1003218.s003.pdf]

**Table S2. Genes up-regulated in *pwr-2*.** Highlighted rows indicate genes discussed in the text.

| Genes up-regulated in <i>pwr-2</i> (Fold change $\geq 1.5$ , p-value $\leq 0.005$ ) |                                 |           |              |                                                                                                                                                           |
|-------------------------------------------------------------------------------------|---------------------------------|-----------|--------------|-----------------------------------------------------------------------------------------------------------------------------------------------------------|
| Affymetrix code                                                                     | Abundance ( <i>pwr-2</i> / Col) | AGI code  | Name(s)      | Description                                                                                                                                               |
| 256977_at                                                                           | 3.7415                          | At3g21040 |              | copia-like retrotransposon family                                                                                                                         |
| 250155_at                                                                           | 3.6587                          | At5g15160 | BNQ2         | belongs to a family of atypical non-DNA binding basic helix-loop-helix (bHLH). Directly and negatively regulated by AP3 and PI in petals.                 |
| 256976_at                                                                           | 3.2642                          | At3g21020 |              | copia-like retrotransposon family                                                                                                                         |
| 256335_at                                                                           | 3.1118                          | At1g72110 |              | O-acyltransferase (WSD1-like) family protein                                                                                                              |
| 256589_at                                                                           | 2.8024                          | At3g28740 | CYP81D1      | cytochrome P450 family protein                                                                                                                            |
| 264830_at                                                                           | 2.6999                          | At1g03710 |              | Cystatin/monellin superfamily protein                                                                                                                     |
| 249920_at                                                                           | 2.6356                          | At5g19260 | FAF3         | member of the FAF family proteins encoded by the FANTASTIC FOUR (FAF) genes                                                                               |
| 264638_at                                                                           | 2.5970                          | At1g65480 | FT           | FT, together with LFY, promotes flowering and is antagonistic with its homologous gene, TERMINAL FLOWER1 (TFL1).                                          |
| 249383_at                                                                           | 2.4854                          | At5g39860 | BNQ1, PRE1   | Functions downstream of BZR1 to mediate brassinosteroid regulation of cell elongation. BNQ1 is directly and negatively regulated by AP3 and PI in petals. |
| 266532_at                                                                           | 2.1224                          | At2g16890 |              | UDP-glucuronosyl/UDP-glucosyl transferase family protein                                                                                                  |
| 256569_at                                                                           | 2.1001                          | At3g19550 |              | unknown protein                                                                                                                                           |
| 264363_at                                                                           | 2.0052                          | At1g03170 | FAF2         | member of the FAF family proteins encoded by the FANTASTIC FOUR (FAF) genes                                                                               |
| 248953_at                                                                           | 1.9989                          | At5g45430 |              | protein kinase superfamily protein                                                                                                                        |
| 256603_at                                                                           | 1.9974                          | At3g28270 |              | protein of unknown function                                                                                                                               |
| 246250_at                                                                           | 1.9632                          | At4g36880 | CP1          | cysteine proteinase1                                                                                                                                      |
| 267497_at                                                                           | 1.9090                          | At2g30540 |              | Thioredoxin superfamily protein                                                                                                                           |
| 254490_at                                                                           | 1.8740                          | At4g20320 |              | CTP synthase family protein                                                                                                                               |
| 254663_at                                                                           | 1.8649                          | At4g18290 | KAT2         | member of the Shaker family potassium ion (K <sup>+</sup> ) channel                                                                                       |
| 257136_at                                                                           | 1.8484                          | At3g12890 | ASML2        | encodes a protein belonging to a class of CCT (CONSTANS, CONSTANS-like, TOC1) domain proteins                                                             |
| 249774_at                                                                           | 1.8403                          | At5g24150 | SQE5, SQP1   | squalene monooxygenase gene homolog                                                                                                                       |
| 251015_at                                                                           | 1.8248                          | At5g02480 |              | HSP20-like chaperones superfamily protein                                                                                                                 |
| 247377_at                                                                           | 1.7714                          | At5g63180 |              | pectate lyase superfamily protein                                                                                                                         |
| 247351_at                                                                           | 1.7486                          | At5g63790 | AC102        | encodes a member of the NAC family of transcription factors                                                                                               |
| 259680_at                                                                           | 1.7350                          | At1g77690 | LAX3         | Encodes an auxin influx carrier LAX3 (Like Aux1) that promotes lateral root emergence                                                                     |
| 253064_at                                                                           | 1.7288                          | At4g37730 | AtbZIP7      | bZIP transcription factor family protein                                                                                                                  |
| 266951_at                                                                           | 1.7090                          | At2g18940 |              | pentatricopeptide (PPR) repeat-containing protein                                                                                                         |
| 253496_at                                                                           | 1.7077                          | At4g31870 | ATGPX7, GPX7 | encodes glutathione peroxidase                                                                                                                            |
| 258338_at                                                                           | 1.7064                          | At3g16150 |              | N-terminal nucleophile aminohydrolases (Ntn hydrolases) superfamily protein                                                                               |
| 253252_at                                                                           | 1.7046                          | At4g34740 | ATASE2, CIA1 | encodes glutamine 5-phosphoribosylpyrophosphate amidotransferase                                                                                          |

**Genes up-regulated in *pwr-2* (Fold change  $\geq$  1.5, p-value  $\leq$  0.005)**

| <b>Affymetrix code</b> | <b>Abundance (<i>pwr-2</i> / Col)</b> | <b>AGI code</b> | <b>Name(s)</b>  | <b>Description</b>                                                                                                                                                                                                        |
|------------------------|---------------------------------------|-----------------|-----------------|---------------------------------------------------------------------------------------------------------------------------------------------------------------------------------------------------------------------------|
| 264041_at              | 1.6994                                | At2g03710       | AGL3, SEP4      | This gene belongs to the family of SEP genes. It is involved in the development of sepals, petals, stamens and carpels. Additionally, it plays a central role in the determination of flower meristem and organ identity. |
| 251984_at              | 1.6796                                | At3g53260       | ATPAL2, PAL2    | encodes phenylalanine lyase                                                                                                                                                                                               |
| 253880_at              | 1.6796                                | At4g27590       |                 | heavy metal transport/detoxification superfamily protein                                                                                                                                                                  |
| 267595_at              | 1.6615                                | At2g32990       | AtGH9B8         | glycosyl hydrolase family 9 protein                                                                                                                                                                                       |
| 267509_at              | 1.6577                                | At2g45660       | AGL20, SOC1     | Controls flowering and is required for CO to promote flowering. It acts downstream of FT.                                                                                                                                 |
| 264002_at              | 1.6559                                | At2g22360       |                 | DNAJ heat shock family protein                                                                                                                                                                                            |
| 264280_at              | 1.6512                                | At1g61820       | BGLU46          | beta glucosidase 46 (BGLU46)                                                                                                                                                                                              |
| 252863_at              | 1.6426                                | At4g39800       | MIPS1           | Columbia myo-inositol-1-phosphate synthase mRNA                                                                                                                                                                           |
| 245456_at              | 1.6405                                | At4g16950       | RPP5            | contains a putative nucleotide binding site and leucine-rich repeats                                                                                                                                                      |
| 262981_at              | 1.6337                                | At1g75590       |                 | SAUR-like auxin-responsive protein family                                                                                                                                                                                 |
| 251759_at              | 1.6311                                | At3g55630       | ATDFD, ATDFD    | Encodes one of the three folylpolyglutamate synthetase isoforms                                                                                                                                                           |
| 249007_at              | 1.6311                                | At5g44650       |                 | encodes a nucleus-encoded thylakoid protein                                                                                                                                                                               |
| 249596_s_at            | 1.6309                                | At5g37950       |                 | UDP-Glycosyltransferase superfamily protein                                                                                                                                                                               |
| 245819_at              | 1.6242                                | At1g26310       | AGL10, CAL      | Floral homeotic gene encoding a MADS domain protein homologous to AP1.                                                                                                                                                    |
| 253617_at              | 1.6241                                | At4g30410       |                 | sequence-specific DNA binding transcription factors                                                                                                                                                                       |
| 247488_at              | 1.6216                                | At5g61820       |                 | unknown protein                                                                                                                                                                                                           |
| 264141_at              | 1.6189                                | At1g79090       |                 | unknown protein                                                                                                                                                                                                           |
| 252652_at              | 1.6182                                | At3g44720       | ADT4            | encodes a plastid-localized arogenate dehydratase involved in phenylalanine biosynthesis                                                                                                                                  |
| 250013_at              | 1.6114                                | At5g18040       |                 | unknown protein                                                                                                                                                                                                           |
| 246844_at              | 1.6074                                | At4g38620       | ATMYB4, ATMYB86 | MYB gene that encodes a transcriptional repressor of the C4H gene which is involved in the biosynthesis of sinapate esters                                                                                                |
| 250185_at              | 1.6004                                | At5g14310       | AtCXE16         | carboxyesterase 16                                                                                                                                                                                                        |
| 251668_at              | 1.5961                                | At3g57010       |                 | calcium-dependent phosphotriesterase superfamily protein                                                                                                                                                                  |
| 247345_at              | 1.5897                                | At5g63760       | ARI15           | functions in zinc-ion binding                                                                                                                                                                                             |
| 260831_at              | 1.5863                                | At1g06830       |                 | glutaredoxin family protein                                                                                                                                                                                               |
| 257285_at              | 1.5856                                | At3g29760       |                 | Haloacid dehalogenase-like hydrolase (HAD) superfamily protein                                                                                                                                                            |
| 263612_at              | 1.5807                                | At2g16440       | MCM4            | MINICHROMOSOME MAINTENANCE 4 (MCM4); functions in nucleoside-triphosphatase activity                                                                                                                                      |
| 258295_at              | 1.5805                                | At3g23400       | FIB4            | Encodes FIBRILLIN 4 (FIB4). The fibrillins are a large family of chloroplast proteins that have been linked with stress tolerance and disease resistance.                                                                 |
| 253495_at              | 1.5718                                | At4g31850       | PGR3            | encodes a protein containing 27 pentatricopeptide repeat (PPR) motifs                                                                                                                                                     |
| 250312_at              | 1.5673                                | At5g12260       |                 | similar to glycosyltransferase family protein 2                                                                                                                                                                           |

| Genes up-regulated in <i>pwr-2</i> (Fold change $\geq 1.5$ , p-value $\leq 0.005$ ) |                                 |           |                |                                                                                                                                                                                             |
|-------------------------------------------------------------------------------------|---------------------------------|-----------|----------------|---------------------------------------------------------------------------------------------------------------------------------------------------------------------------------------------|
| Affymetrix code                                                                     | Abundance ( <i>pwr-2</i> / Col) | AGI code  | Name(s)        | Description                                                                                                                                                                                 |
| 266760_at                                                                           | 1.5657                          | At2g46870 | NGA1           | NGA1 (NGATHA1); transcription factor                                                                                                                                                        |
| 247754_at                                                                           | 1.5561                          | At5g59080 |                | unknown protein                                                                                                                                                                             |
| 253052_at                                                                           | 1.5551                          | At4g37310 | CYP81H1        | member of CYP81H                                                                                                                                                                            |
| 248261_at                                                                           | 1.5550                          | At5g53280 | PDV1           | integral outer envelope membrane protein, component of the plastid division machinery                                                                                                       |
| 260484_at                                                                           | 1.5524                          | At1g68360 |                | C2H2 and C2HC zinc fingers superfamily protein                                                                                                                                              |
| 251929_at                                                                           | 1.5515                          | At3g53920 | SIG3, SIGC     | Encodes a sigma-like transcription factor, Sigma 3 (SIG3 or SIGC). As a subunit of chloroplast RNA polymerase, SIG3 confers the ability to recognize promoter sequences on the core enzyme. |
| 255149_at                                                                           | 1.5464                          | At4g08150 | BP, BP1, KT1   | A member of class I knotted1-like homeobox gene family (together with KNAT2).                                                                                                               |
| 257227_at                                                                           | 1.5434                          | At3g27820 | MDAR4          | encodes a peroxisome membrane-bound monodehydroascorbate reductase                                                                                                                          |
| 261225_at                                                                           | 1.5422                          | At1g20100 |                | unknown protein                                                                                                                                                                             |
| 262348_at                                                                           | 1.5403                          | At2g48160 |                | PWWP domain-containing protein                                                                                                                                                              |
| 257033_at                                                                           | 1.5384                          | At3g19170 | ATZNMP         | Zinc metalloprotease pitrilysin subfamily A. Signal peptide degrading enzyme targeted to mitochondria and chloroplasts                                                                      |
| 261141_at                                                                           | 1.5362                          | At1g19740 |                | ATP-dependent protease La (LON) domain-containing protein                                                                                                                                   |
| 264799_at                                                                           | 1.5353                          | At1g08550 | AVDE1, NPQ1    | Violaxanthin deepoxidase involved in xanthophyll cycle                                                                                                                                      |
| 258878_at                                                                           | 1.5350                          | At3g03170 |                | unknown protein                                                                                                                                                                             |
| 265672_at                                                                           | 1.5323                          | At2g31980 | CYS2           | PHYTOCYSTATIN2                                                                                                                                                                              |
| 267250_at                                                                           | 1.5305                          | At2g23060 |                | Acyl-CoA N-acyltransferases (NAT) superfamily protein                                                                                                                                       |
| 258452_at                                                                           | 1.5287                          | At3g22370 | AOX1A, ATAOX1A | Encodes an isoform of alternative oxidase that is expressed in rosettes, flowers, and root.                                                                                                 |
| 250335_at                                                                           | 1.5270                          | At5g11650 |                | hydrolase, alpha/beta fold family protein                                                                                                                                                   |
| 248042_at                                                                           | 1.5266                          | At5g55960 |                |                                                                                                                                                                                             |
| 252591_at                                                                           | 1.5201                          | At3g45600 | TET3           | Member of TETRASPANIN family                                                                                                                                                                |
| 260494_at                                                                           | 1.5021                          | At2g41820 |                | leucine-rich repeat transmembrane kinase family protein                                                                                                                                     |
| 265630_at                                                                           | 1.5016                          | At2g27350 |                | OTU-like cysteine protease family protein                                                                                                                                                   |
